# Supplementary material
Source: publisher figshare collection journal article supplement (https://acs.figshare.com/ndownloader/files/5673111)
Supplement: Supplementary file 1 [file 5673111]

# BIOCHEMISTRY

including biophysical chemistry & molecular biology

Biochemistry, 1996, 35(16), 5264-5271, DOI: [10.1021/bi952520q](https://doi.org/10.1021/bi952520q)

## Terms & Conditions

Electronic Supporting Information files are available without a subscription to ACS Web Editions. The American Chemical Society holds a copyright ownership interest in any copyrightable Supporting Information. Files available from the ACS website may be downloaded for personal use only. Users are not otherwise permitted to reproduce, republish, redistribute, or sell any Supporting Information from the ACS website, either in whole or in part, in either machine-readable form or any other form without permission from the American Chemical Society. For permission to reproduce, republish and redistribute this material, requesters must process their own requests via the RightsLink permission system. Information about how to use the RightsLink permission system can be found at <http://pubs.acs.org/page/copyright/permissions.html>

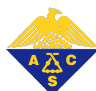

ACS Publications

MOST TRUSTED. MOST CITED. MOST READ.

Copyright © 1996 American Chemical Society

K-5271-m1

## Supplementary Material for Microfilm Edition

### Functional and Sequence Characterization of Coagulation Factor IX/Factor X-Binding Protein from the venom of *Echis carinatus leucogaster*

Yuh-Ling Chen and Inn-Ho Tsai

#### EXPERIMENTAL PROCEDURES

*Materials.* ECLV IX/X-bp was purified from the venom of *Echis carinatus leucogaster* by cation exchanger chromatography followed by RP-HPLC (Cosmosil C<sub>8</sub> column, 10 × 150 mm, Nakara Chemicals, Ltd., Kyoto). Trifluoroacetic acid (TFA), acetonitrile, dithiothreitol and 4-vinylpyridine were purchased from Merck, Germany. Sequencing grade Arg-C endoproteinase, trypsin, chymotrypsin, Glu-C endoproteinase and Asp-N endoproteinase were from Boehringer Mannheim (Germany).

*Reduction and pyridylethylation.* ECLV IX/X-bp (20 nmol) was denatured in 500 µl of 0.25 M Tris-HCl buffer (pH 8.5), containing 6M guanidine hydrochloride, 1 mM EDTA, and dithiothreitol (14 µmol) under N<sub>2</sub> gas at 50°C for 2.5 h. The protein was alkylated by adding 4.5 µl of 4-vinylpyridine (42 µmol) and incubated at room temperature for 2 h (Atoda *et al.*, 1991). S-pyridylethylated subunits were purified by RP-HPLC using a Cosmosil C<sub>8</sub> column (1 × 15 cm). Elution was performed with a gradient of 0-30% acetonitrile (containing 0.07% TFA) over 10 min at a flow rate of 1 ml/min, followed by a gradient of 30-45% acetonitrile over 40 min. The effluent was monitored at 230 nm.

*Amino acid analysis and sequencing.* Amino acid analysis was performed by vapour-phase hydrolysis at 158°C for 30 min using 7M HCl/10% TFA/0.1% phenol (Chang & Liu,

K-5271-m2

1988), and the hydrolysates were derivatized to dimethyl-aminoazobenzenesulfonyl amino acids before separation by RP-HPLC (Kencht & Chang, 1986). An automated gas-phase sequencer (Model 477A, Applied Biosystems, USA) was used, and the phenylthiohydantoin derivatives of amino acids were determined by an on-line HPLC system (Hunkapiller *et al.*, 1983).

*Proteolytic digestion and peptide separation.* The alkylated  $\alpha$  subunit (100  $\mu$ g) was hydrolyzed with 2  $\mu$ g of trypsin or Asp-N endoproteinase in 0.1 ml of 50 mM Tris-HCl buffer (pH 8.0) containing 2 M urea at 37°C for 20 h. Digestion of the alkylated subunits (100  $\mu$ g) with Glu-C endoproteinase (2  $\mu$ g) was performed in 25 mM ammonium carbonate (pH 7.8) containing 1.0 M guanidine-HCl at 25°C for 20 h. Alkylated  $\beta$  subunit (100  $\mu$ g) was hydrolyzed with 2  $\mu$ g of Arg-C endopeptidase in 0.1 ml of 50 mM Tris-HCl containing 1 mM CaCl<sub>2</sub>, 5 mM dithiothreitol (pH 7.5) at 37°C for 20 h. Alkylated  $\beta$  subunit (100  $\mu$ g) was hydrolyzed with 2  $\mu$ g of chymotrypsin in 0.1 ml of 50 mM Tris-HCl containing 2 M urea (pH 7.5) at 37°C for 20 h. Peptides after digestion were separated by RP-HPLC on a Cosmosil C8 column and eluted with a linear gradient of acetonitrile in 0.07% trifluoroacetic acid at a flow rate of 1.0 ml/min. The effluent was monitored at 205 nm. After HPLC the purified peptides were subjected to amino acid analyses and sequencing.

*Determination of disulfide bridges.* The intact protein (0.3 mg) was digested with trypsin or Glu-C endoproteinase in 25 mM ammonium carbonate buffer, pH 7.8, containing 1.0 M guanidine-HCl at 37°C or 25°C for 24h with a molar ratio of enzyme to substrate of 1 to 30. Peptides were separated by RP-HPLC chromatography as described above, and 1/5 aliquots were subjected to amino acid analyses and sequencing. The peptide E15 was further digested with 1  $\mu$ g of  $\alpha$ -chymotrypsin in 50 mM Tris-HCl containing 2 M urea (pH 7.5) at 37°C for 20 h and separated by RP-HPLC.

K-5271-M3

Table S1  
Amino acid compositions of the  $\alpha$ - and  $\beta$ -subunits of  
ECLV IX/X-bp.

| Amino acid       | $\alpha$ subunit<br>Residues / molecule | $\beta$ subunit<br>Residues / molecule |
|------------------|-----------------------------------------|----------------------------------------|
| Asp+Asn          | 8.0 (8)                                 | 9.5 (10)                               |
| Glu+Gln          | 20.9 (21)                               | 13.8 (14)                              |
| Ser              | 12.7 (13)                               | 14.4 (14)                              |
| Thr              | 4.5 (5)                                 | 7.2 (7)                                |
| Gly              | 9.2 (10)                                | 8.3 (8)                                |
| Ala              | 2.7 (2)                                 | 10.2 (10)                              |
| Arg              | 4.6 (4)                                 | 3.6 (4)                                |
| Pro              | 3.3 (3)                                 | 3.1 (3)                                |
| Val              | 5.8 (6)                                 | 5.9 (7)                                |
| Met              | 0.2 (0)                                 | 1.2 (1)                                |
| Ile              | 3.5 (4)                                 | 1.8 (2)                                |
| Leu              | 7.4 (8)                                 | 5.2 (5)                                |
| Phe              | 5.4 (6)                                 | 6.6 (7)                                |
| Lys              | 17.3 (18)                               | 9.9 (11)                               |
| His              | 3.8 (4)                                 | 3.1 (3)                                |
| Tyr              | 4.5 (5)                                 | 3.6 (4)                                |
| Cys <sup>a</sup> | 6.5 (7)                                 | 6.7 (7)                                |
| Trp              | n.d. <sup>b</sup> (7)                   | n.d. <sup>b</sup> (10)                 |
| Total            | 133                                     | 125                                    |

<sup>a</sup> S-pyridylethylcysteine

<sup>b</sup> Not determined

## FIGURE LEGENDS

FIGURE S1: Purification of ECLV IX/X-bp by RP-HPLC. The protein obtained from ion-exchange chromatography was applied to a Cosmosil C8 column ( $1 \times 15$  cm) and eluted with a linear gradient of acetonitrile from 20 to 37% containing 0.07% TFA at a flow rate of 1 ml per min.

FIGURE S2: Separation of the  $\alpha$  and  $\beta$  subunits. S-pyridylethylated ECLV IX/X-bp was applied to a Cosmosil C8 column ( $1 \times 15$  cm) and eluted with a linear gradient of acetonitrile from 30 to 45% containing 0.07% TFA at a flow rate of 1 ml per min.

FIGURE S3: Separation of the tryptic peptides of the alkylated  $\alpha$  subunit by RP-HPLC. The tryptic digest was applied to a Cosmosil C8 column ( $1 \times 15$  cm) and eluted with a linear gradient of acetonitrile from 10 to 50% containing 0.07% TFA at a flow rate of 1 ml per min.

FIGURE S4: Separation of the Glu-C endoproteinase-digested peptides of the alkylated  $\alpha$  subunit by RP-HPLC. The digest was applied to a Cosmosil C8 column ( $1 \times 15$  cm) and eluted with a linear gradient of acetonitrile from 10 to 50% containing 0.07% TFA at a flow rate of 1 ml per min.

FIGURE S5: Separation of the Asp-N endoproteinase-digested peptides of the alkylated  $\alpha$  subunit by RP-HPLC. The digest was applied to a Cosmosil C8 column ( $1 \times 15$  cm) and eluted with a linear gradient of acetonitrile from 10 to 55% containing 0.07% TFA at a flow rate of 1 ml per min.

FIGURE S6: Separation of the Arg-C endoproteinase-digested peptides of the alkylated  $\beta$  subunit by RP-HPLC. The digest was applied to a Cosmosil C8 column ( $0.46 \times 5$  cm) and eluted with a linear gradient of acetonitrile from 20 to 45% containing 0.07% TFA at a flow rate of 1 ml per min.

FIGURE S7: Separation of the chymotrypsin-digested peptides of the alkylated  $\beta$  subunit by RP-HPLC. The digest was applied to a Cosmosil C8 column ( $1 \times 15$  cm) and eluted with a

linear gradient of acetonitrile from 5 to 50% containing 0.07% TFA at a flow rate of 1 ml per min.

FIGURE S8: Separation of the Glu-C endoproteinase-digested peptides of the alkylated  $\beta$  subunit by RP-HPLC. The digest was applied to a Cosmosil C8 column ( $1 \times 15$  cm) and eluted with a linear gradient of acetonitrile from 10 to 50% containing 0.07% TFA at a flow rate of 1 ml per min.

FIGURE S9: Separation of the tryptic peptides of intact ECLV IX/X-bp by RP-HPLC. The digest by trypsin was applied to a Cosmosil C8 column ( $0.46 \times 5$  cm) and eluted with a linear gradient of acetonitrile from 10 to 40% containing 0.07% TFA at a flow rate of 1 ml per min.

FIGURE S10: Separation of the Glu-C endoproteinase-digested peptides of intact ECLV IX/X-bp by RP-HPLC. The digest was applied to a Cosmosil C8 column ( $1 \times 15$  cm) and eluted with a gradient of acetonitrile from 5 to 50% containing 0.07% TFA at a flow rate of 1 ml per min.

FIGURE S11: Separation of the chymotrypsin-digested fragments of the peptide E15 (see Figure S10) by RP-HPLC. The digest was applied to a Cosmosil C8 column ( $0.46 \times 5$  cm) and eluted with a linear gradient of acetonitrile from 10 to 30% containing 0.07% TFA at a flow rate of 1 ml per min.

Fig S1  
R-5271-M6

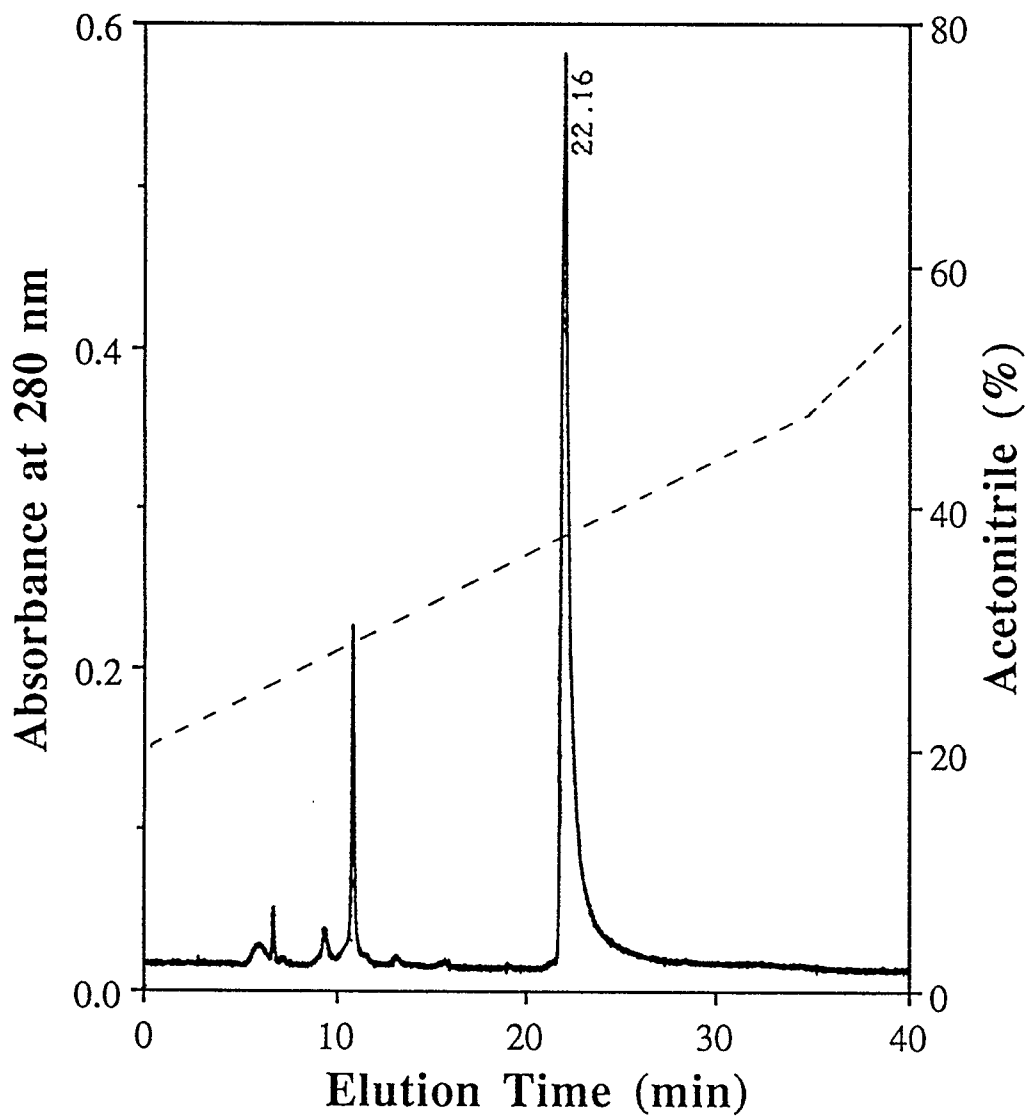

Fig. S2  
K-5271-7M7

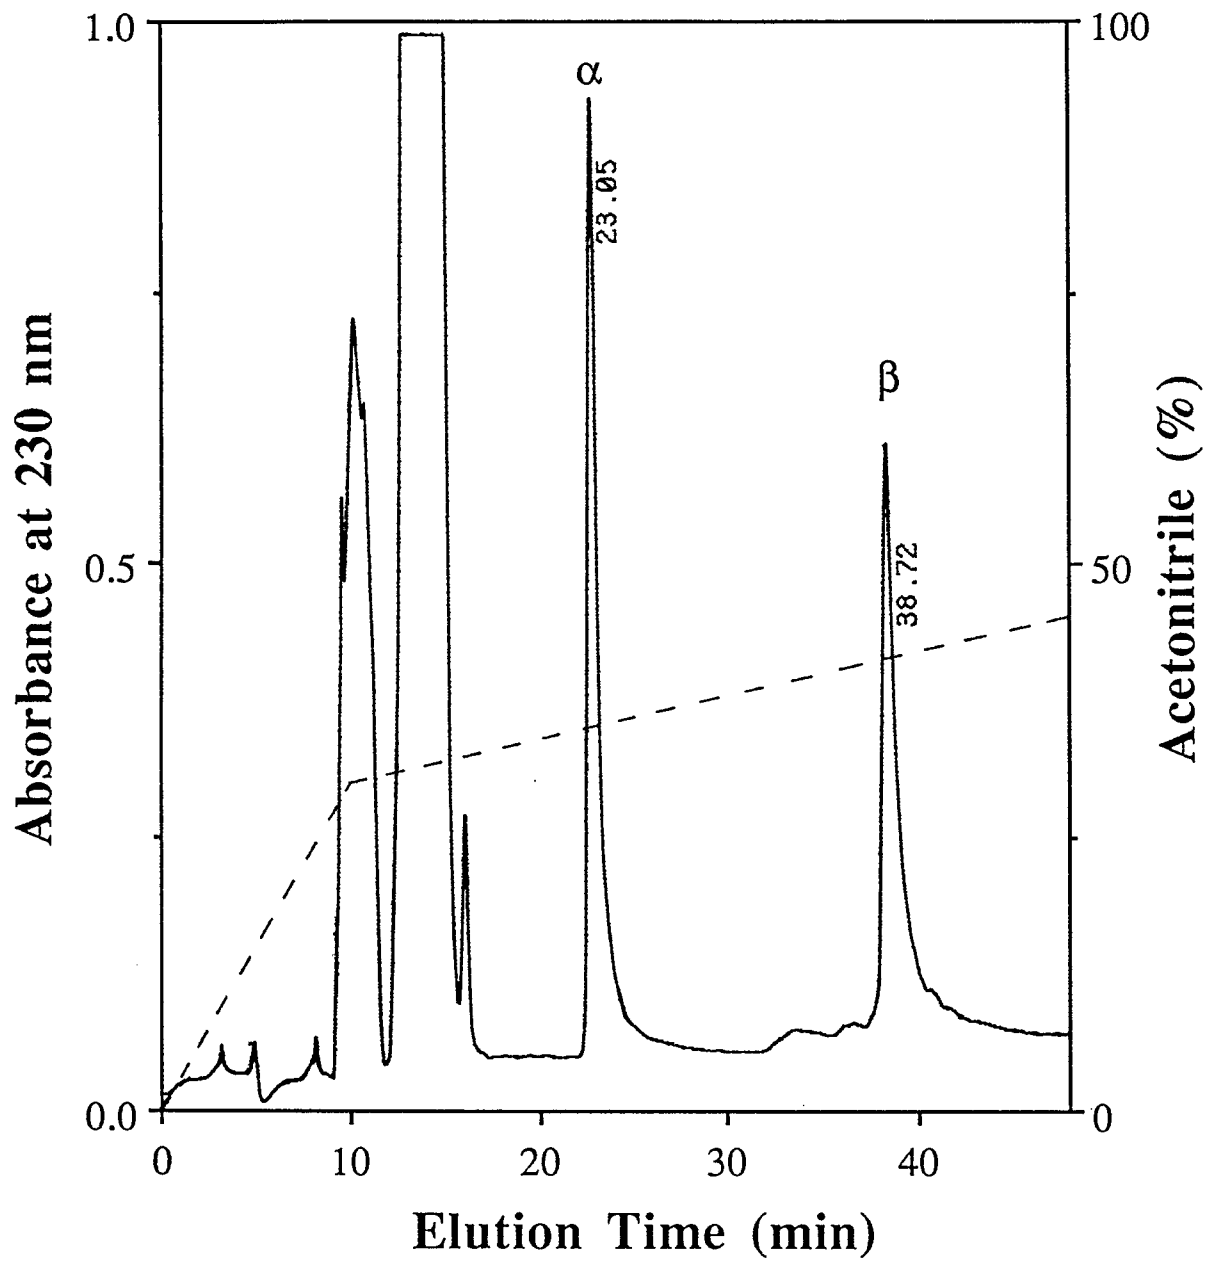



K-5271-m8  
Fig. S3

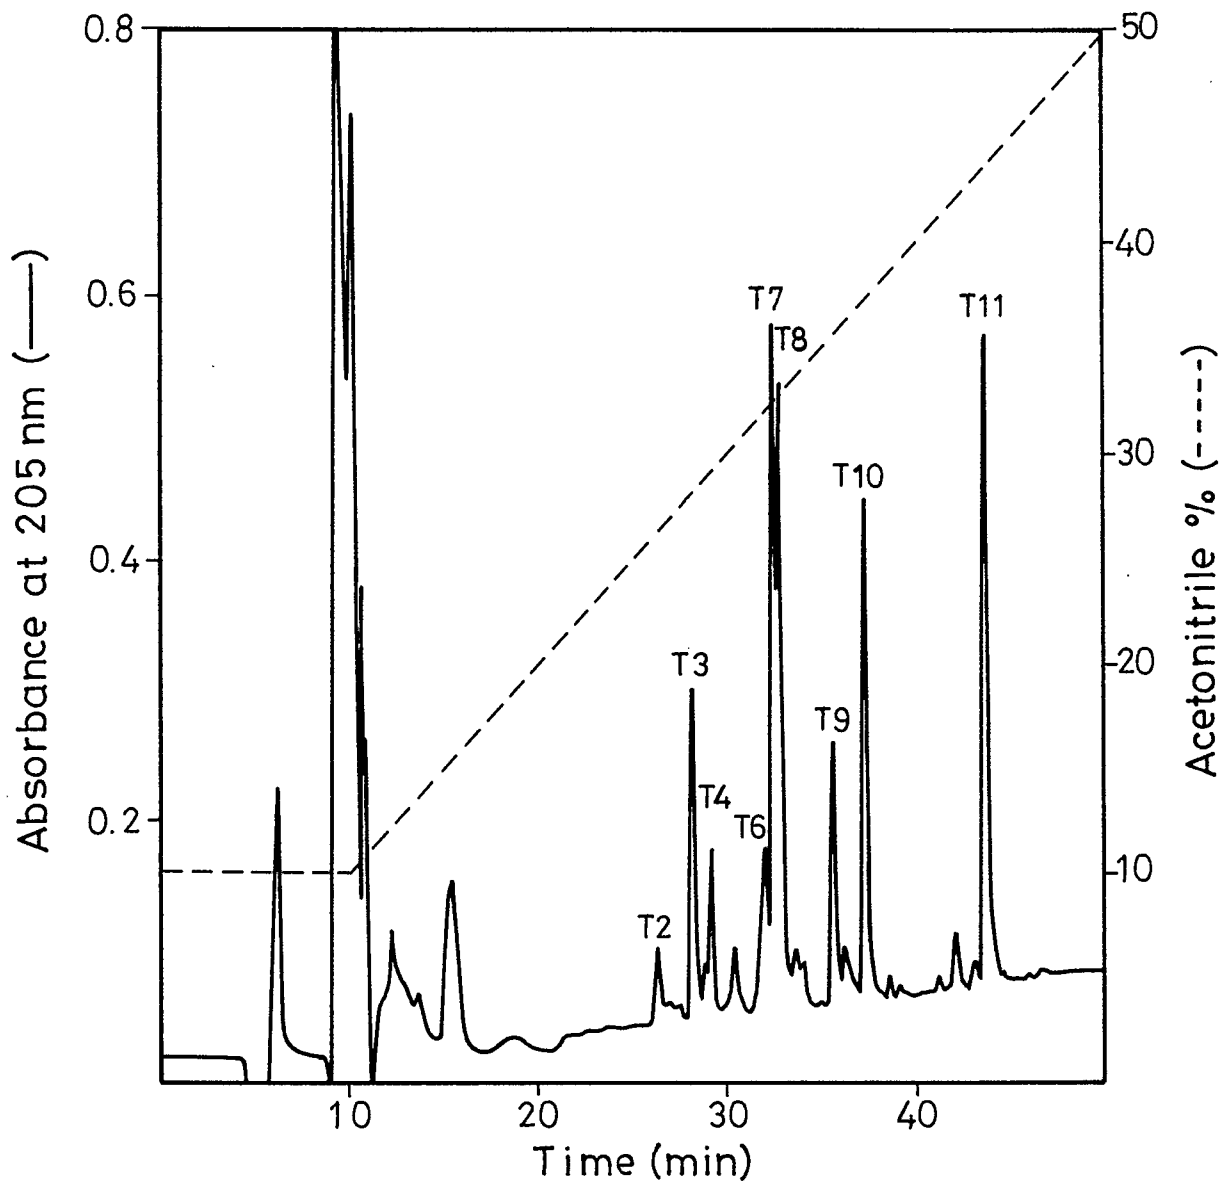

K-5271-M9  
Fig. S4

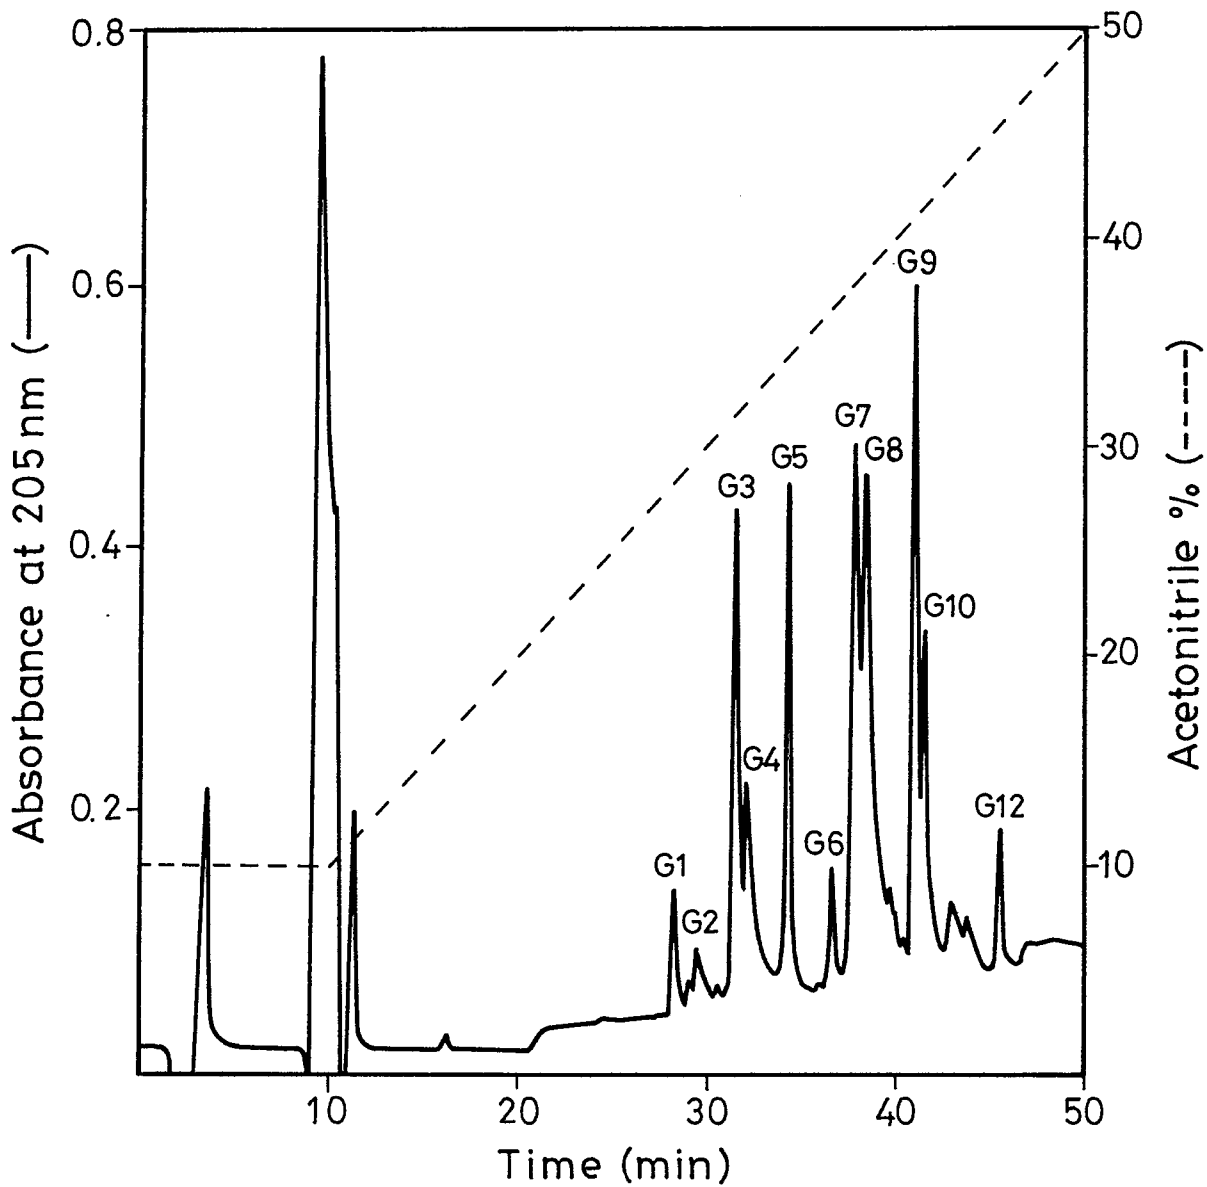

K-5271-M10

Fig. S5

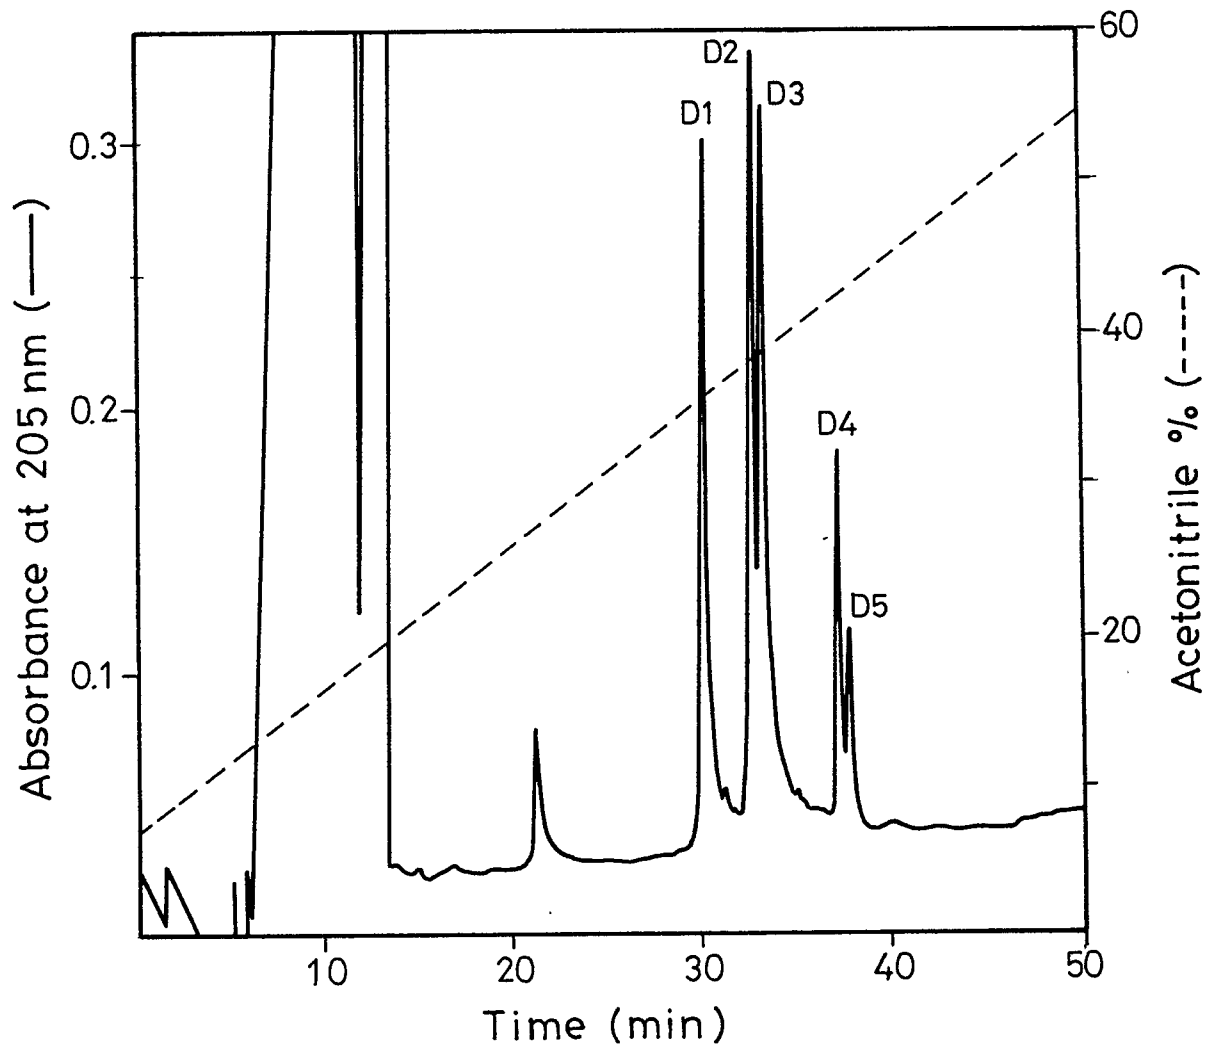

k-5271-m11  
Fig. S6

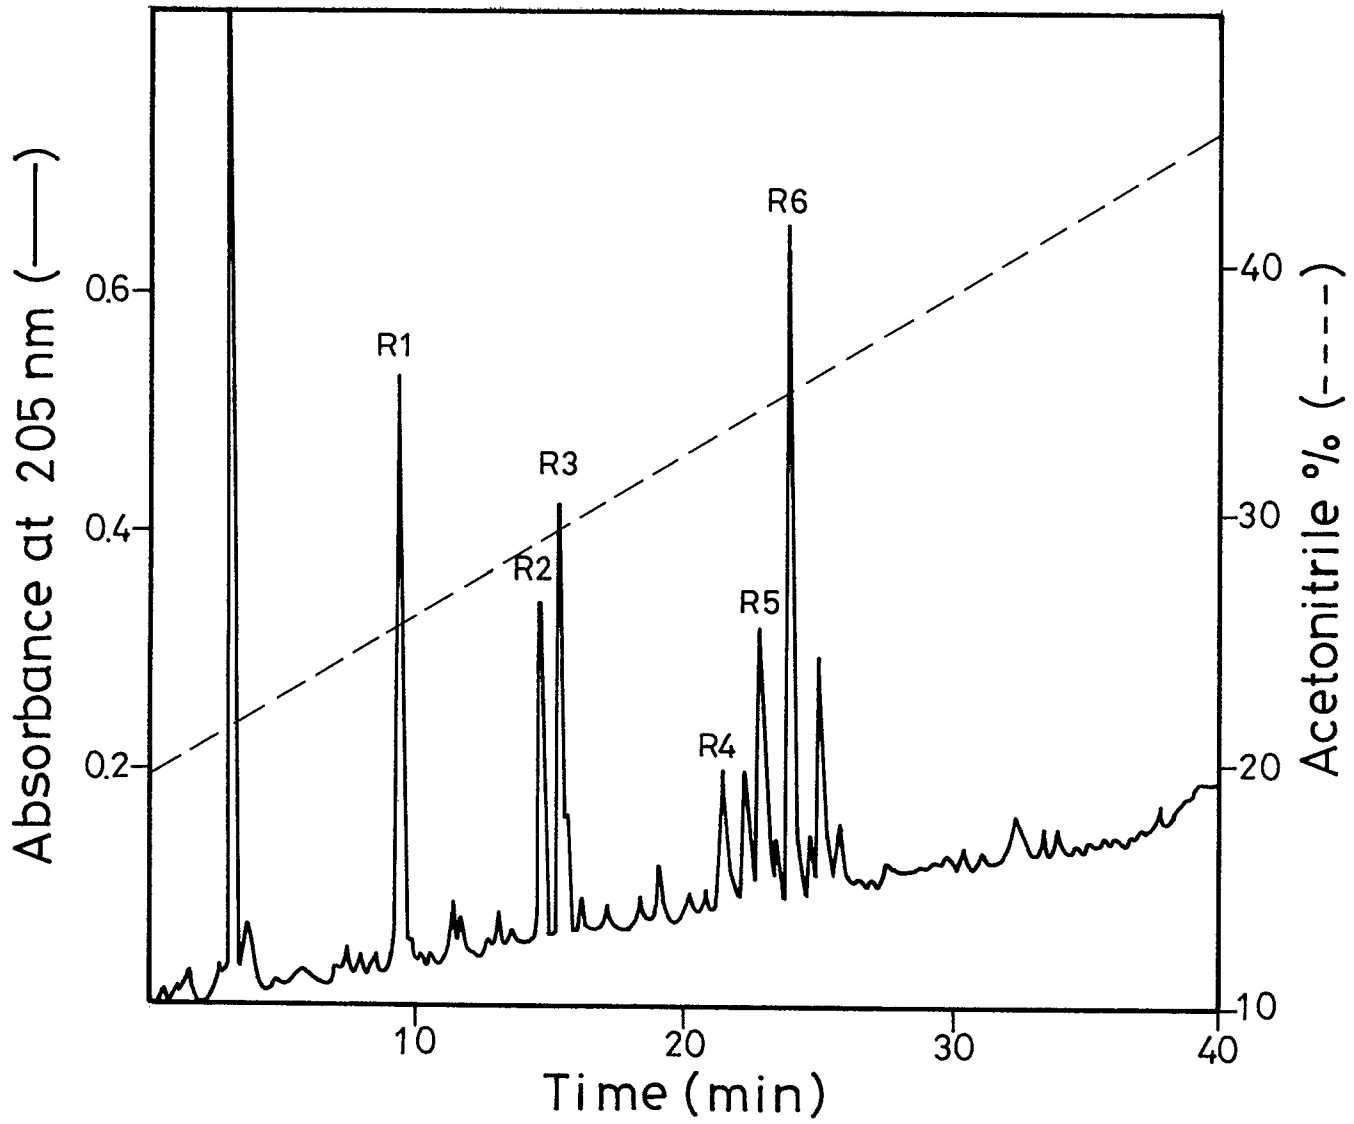

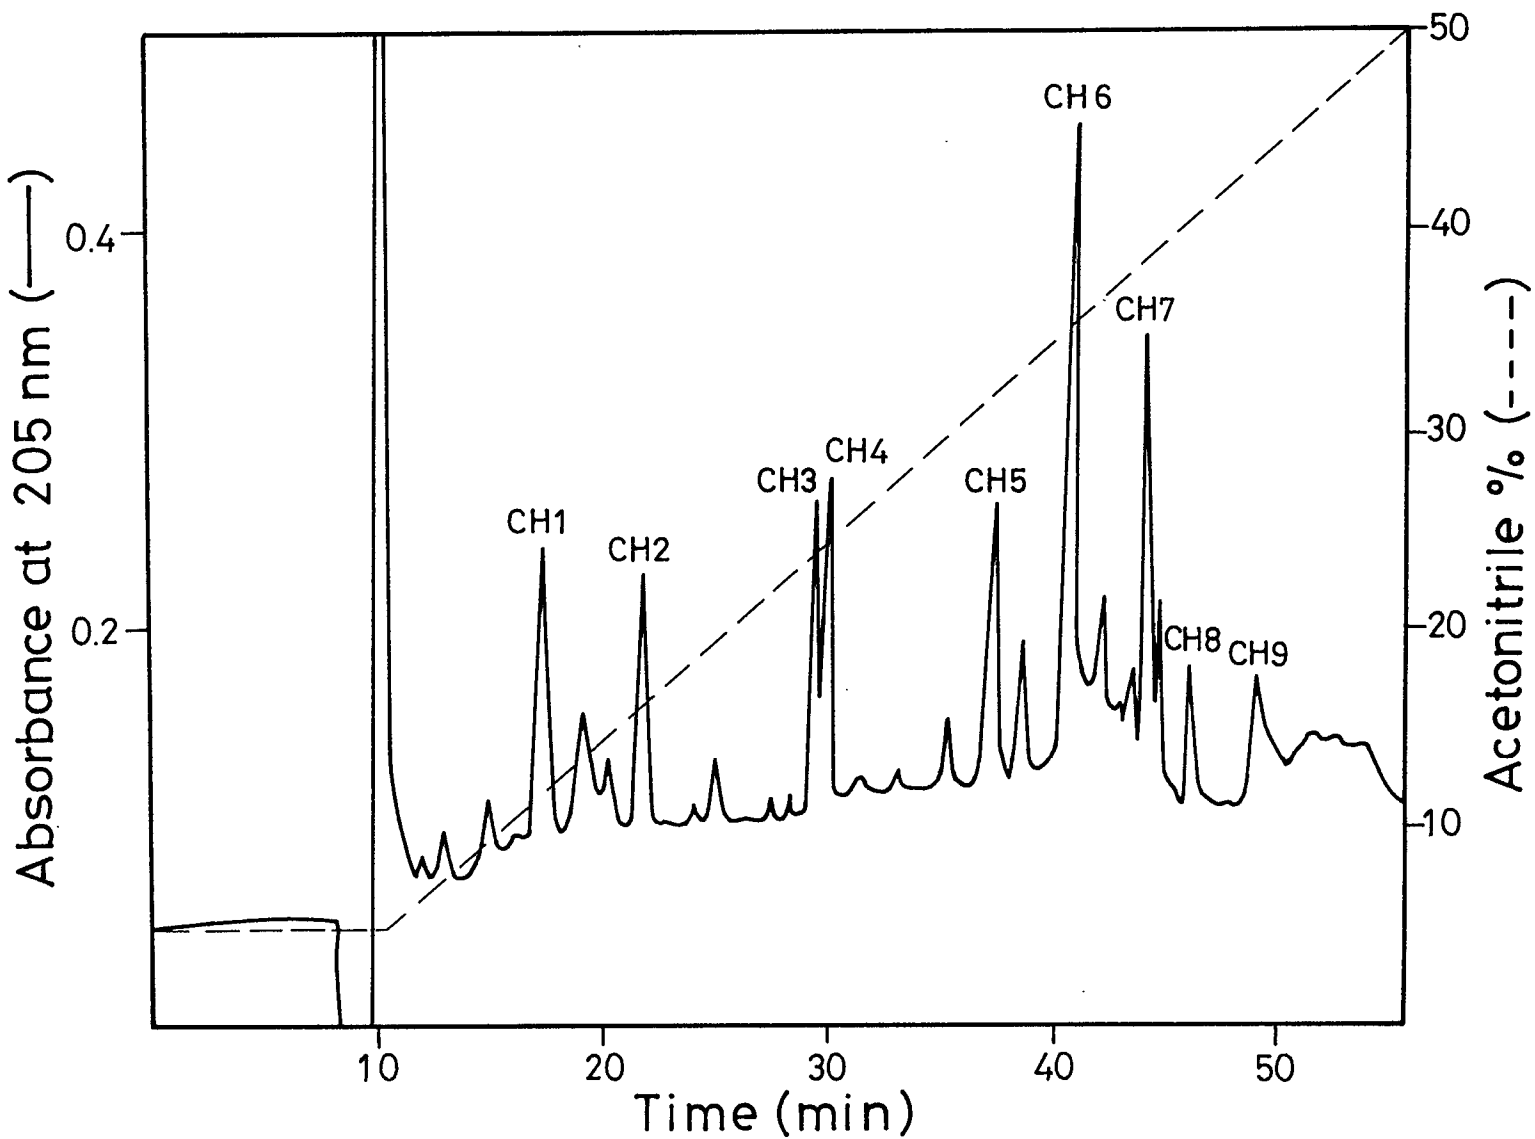

K-5271-M12

Fig. 5

12

K-5271-M13  
Fig. S8

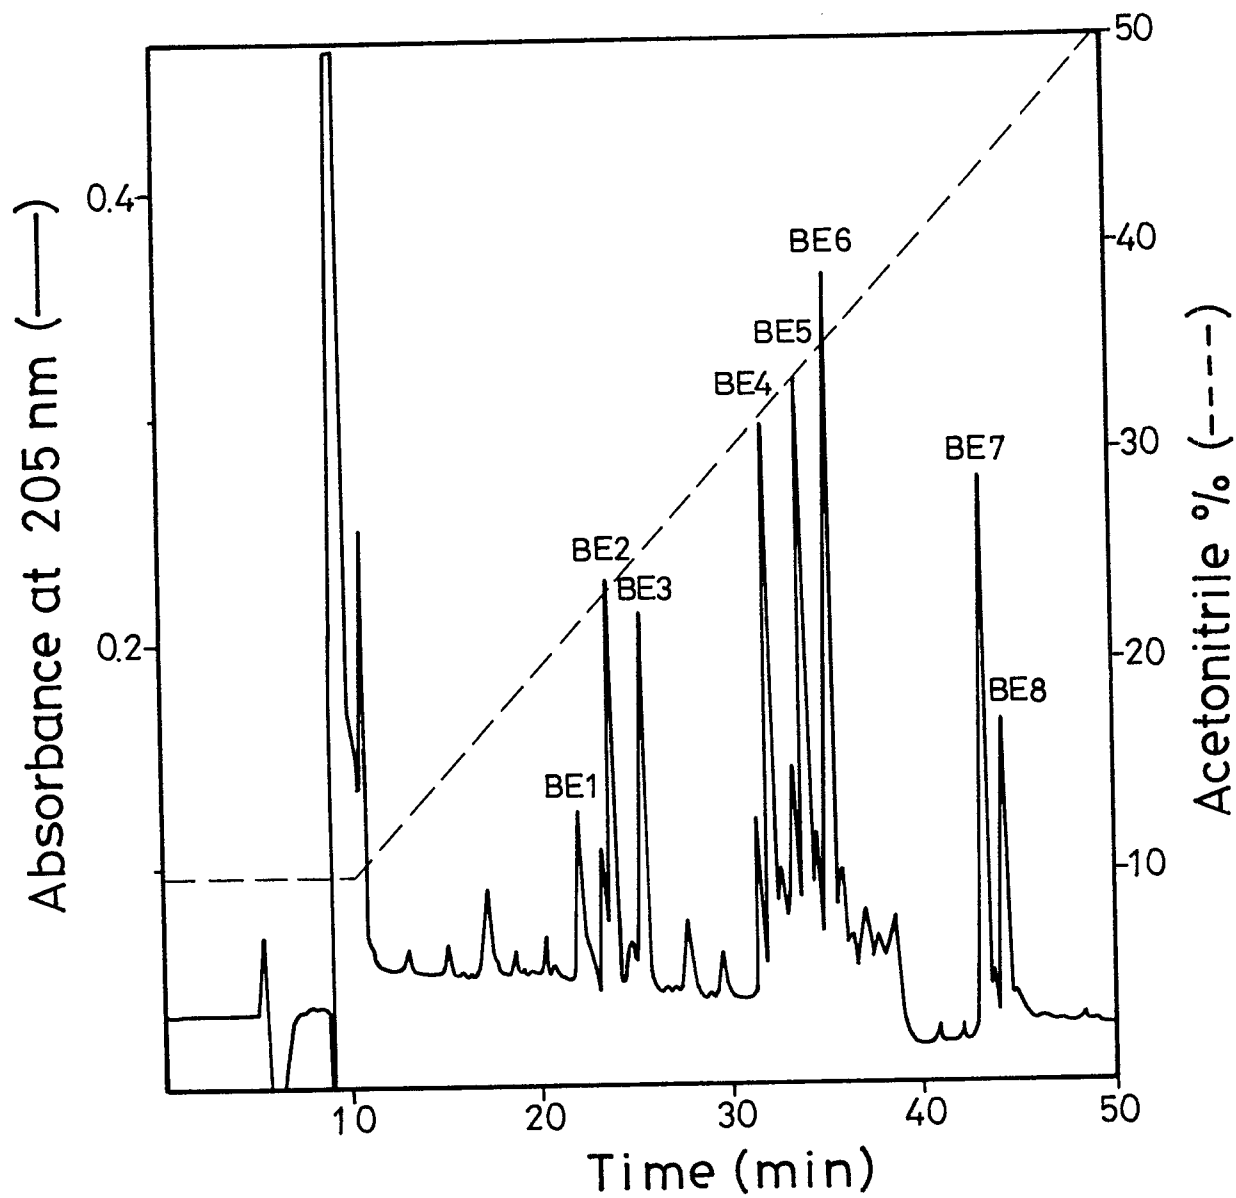

Fig. 59

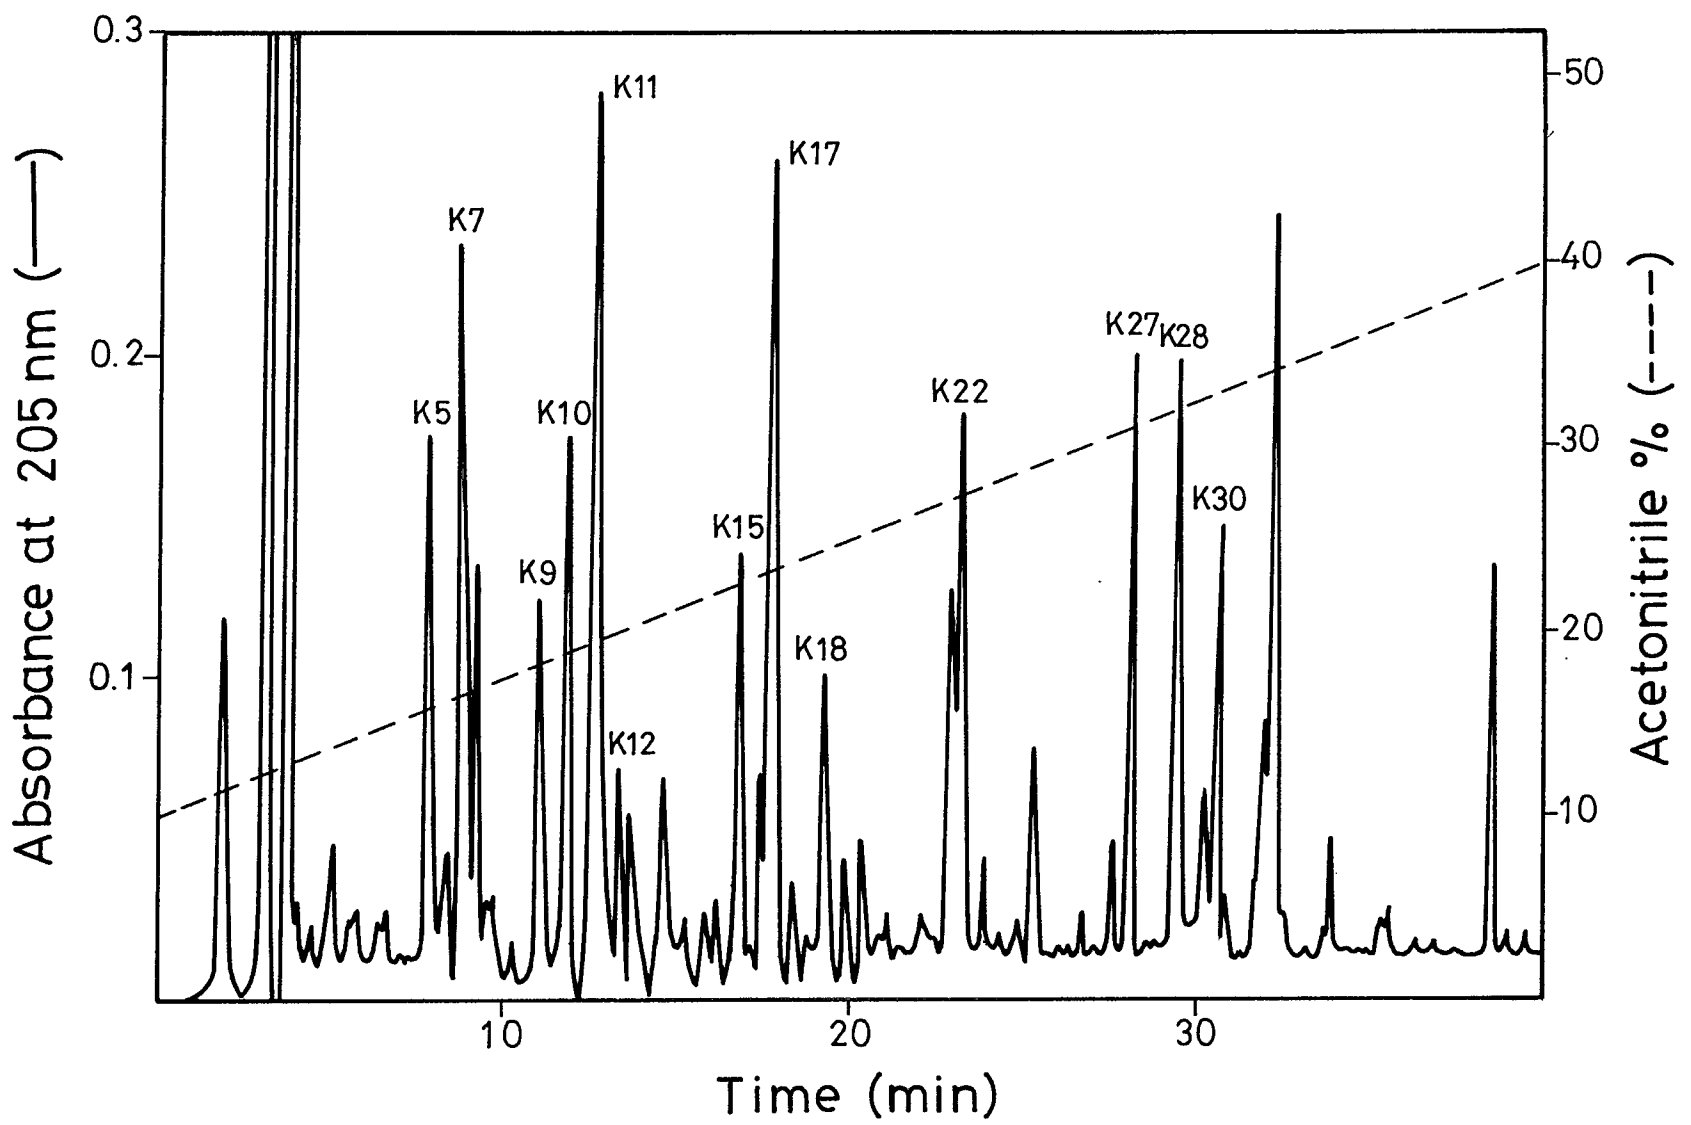

41

K-5271-m14

K-5271-MIS  
Fig. S10

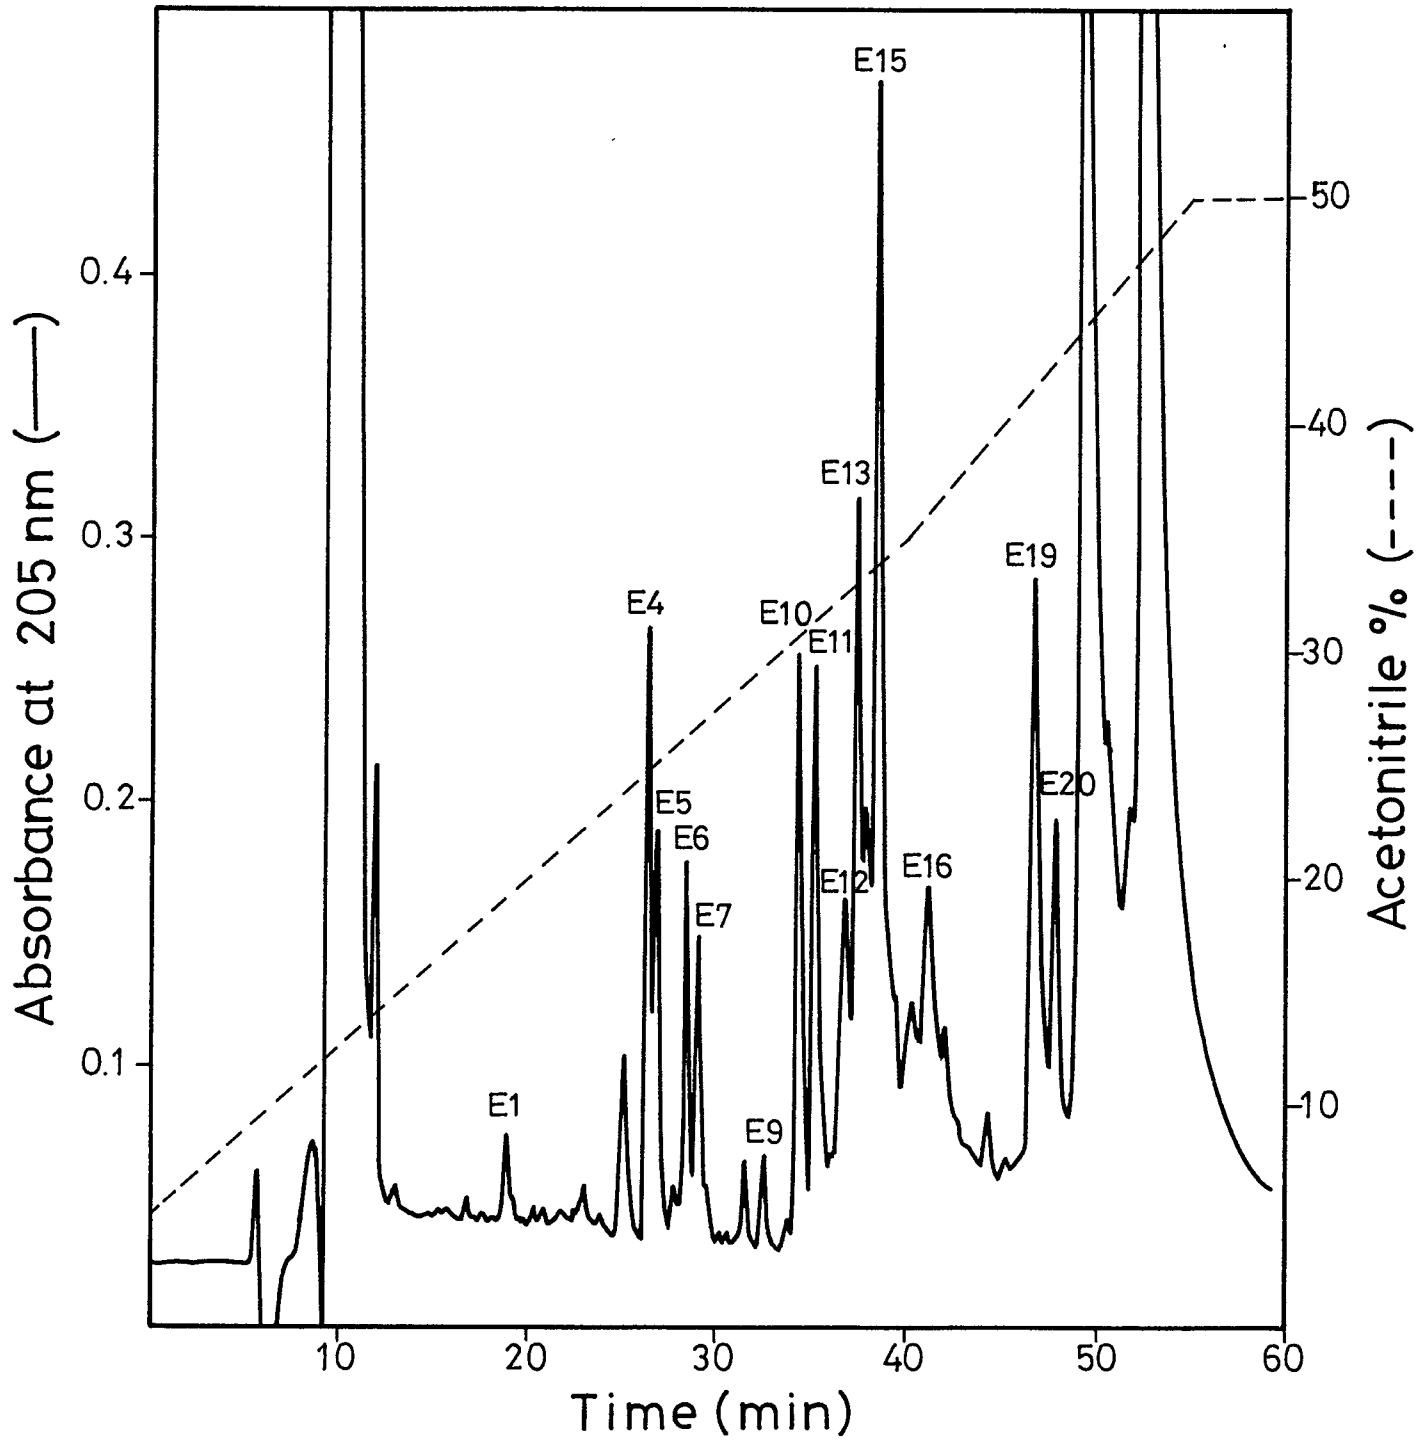



Fig. S11

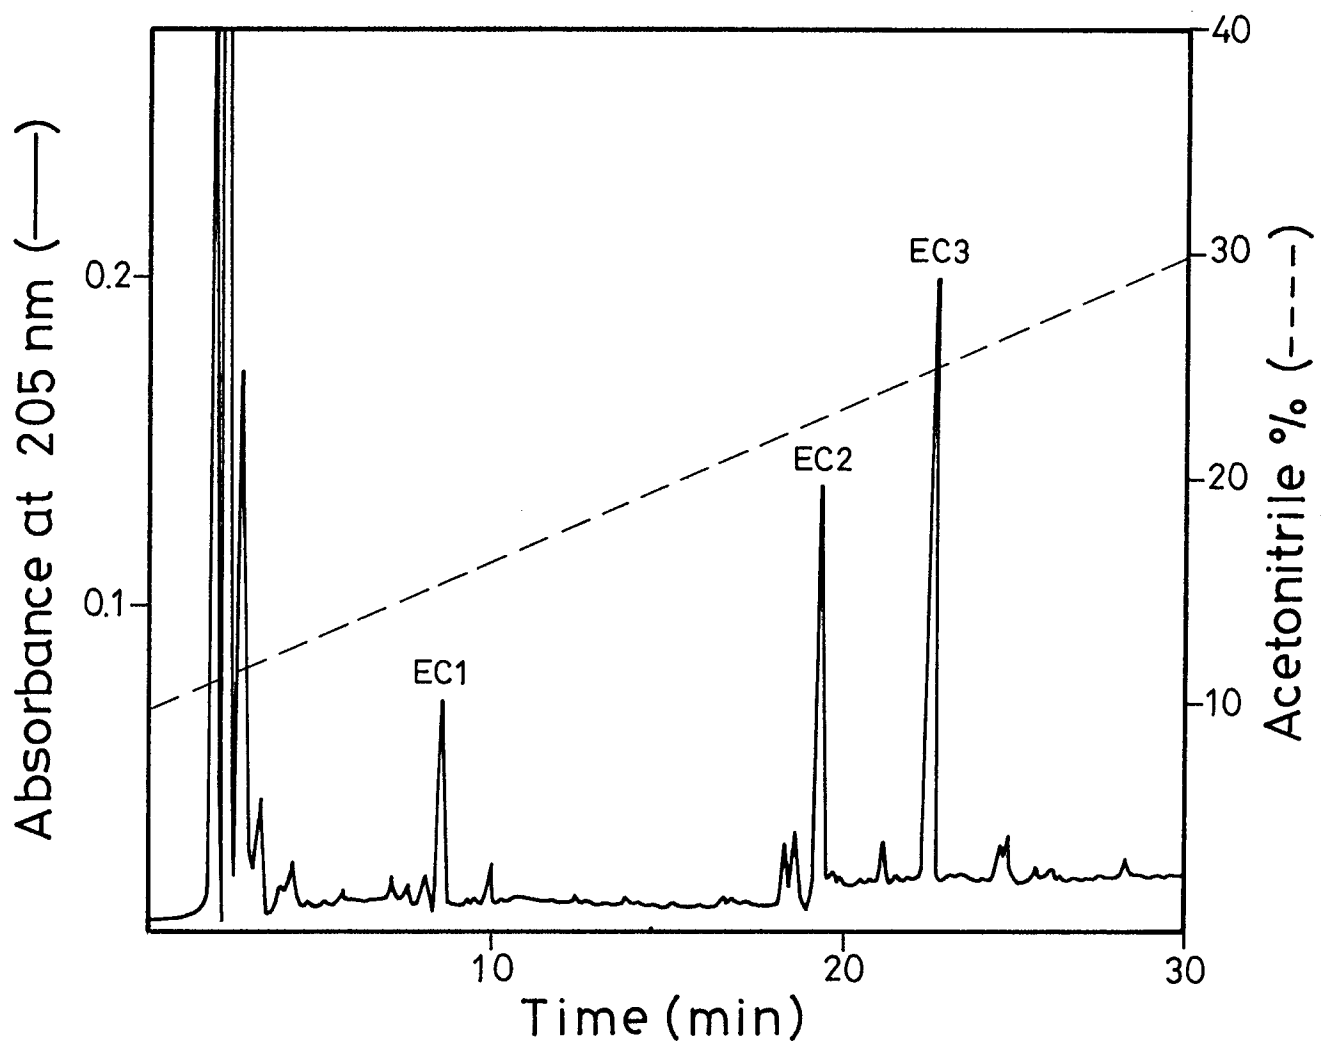

K-5271-M16  
1/1
